# Supplementary material
Source: publisher site journal article supplement (https://www.dovepress.com/article/391578)

**Supplementary materials**

Figure S1. A flow chart of enrolled cases in this study.


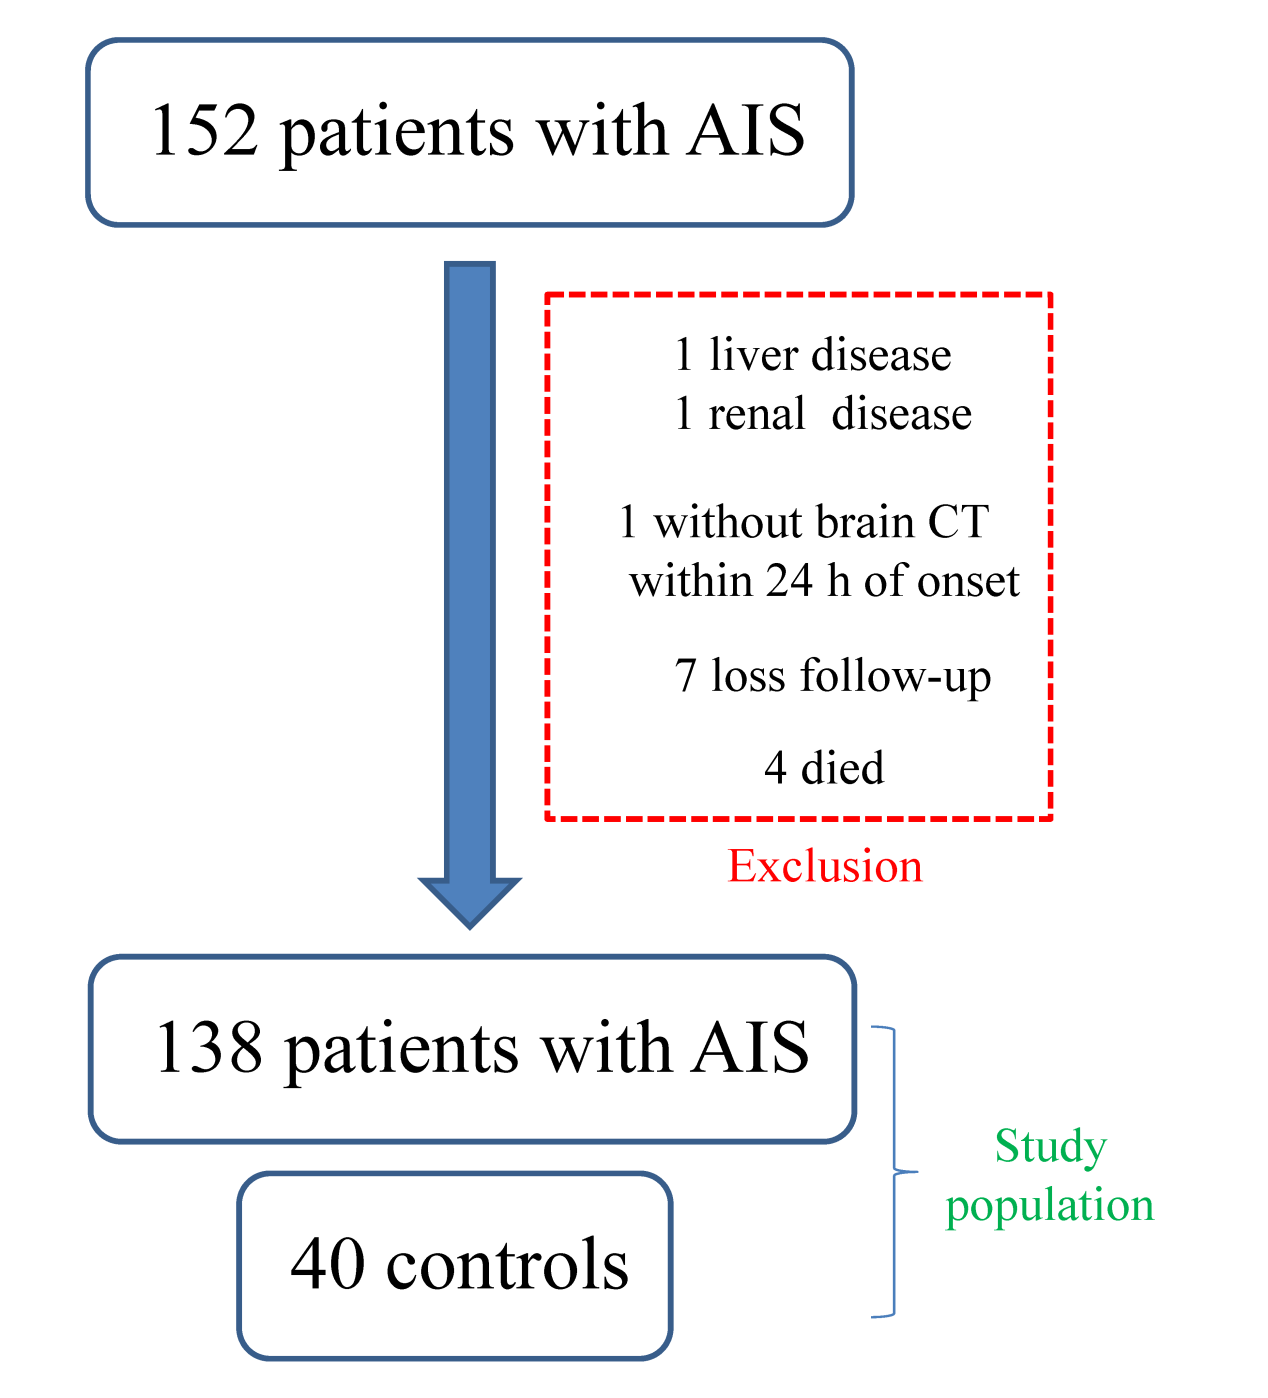

Supplement: Supplementary file 1 [file get_supplementary_file.php]
